# Supplementary material for: Chemical Profile and Screening of Bioactive Metabolites of Rindera graeca (A. DC.) Bois. & Heldr. (Boraginaceae) In Vitro Cultures
Source: MDPI journal article supplement (doi:10.3390/plants10050834), 2021-04-21
Supplement: s1 [file s1]

## Supplementary

# Chemical Profile and Screening of Bioactive Metabolites of *Rindera graeca* (A. DC.) Bois. & Heldr. (Boraginaceae) In Vitro cultures

Konstantia Graikou <sup>1</sup>, Harilaos Damianakos <sup>1</sup>, Christos Ganos <sup>1</sup>, Katarzyna Sykłowska-Baranek <sup>2</sup>, Małgorzata Jeziorek <sup>2</sup>, Agnieszka Pietrosiuk <sup>2</sup>, Christos Roussakis <sup>3</sup> and Ioanna Chinou <sup>1,\*</sup>

<sup>1</sup> Laboratory of Pharmacognosy and Chemistry of Natural Products, Department of Pharmacy, National & Kapodistrian University of Athens, 15771 Zografou, Athens, Greece; kgraikou@pharm.uoa.gr (K.G.); harisdam@pharm.uoa.gr (H.D.); chris50ganos@hotmail.com (C.G.)

<sup>2</sup> Department of Pharmaceutical Biology and Medicinal Plant Biotechnology, Faculty of Pharmacy, Medical University of Warsaw, 1 Banacha, 02-097 Warsaw, Poland; kasiab@farm.amwaw.edu.pl (K.S.-B.); gosiajeziorek@op.pl (M.J.); agnieszka.pietrosiuk@wum.edu.pl (A.P.)

<sup>3</sup> IICi MED/EA 1155- Department Cancer du Poumon et Cbles Moleculaires, UFR Sciences Pharmaceutiques- 9 rue Bias, CEDEX 1, 44035 Nantes, France; christos.roussakis@univ-nantes.fr

\* Correspondence: ichinou@pharm.uoa.gr

# Rosmarinic acid [1, 2]

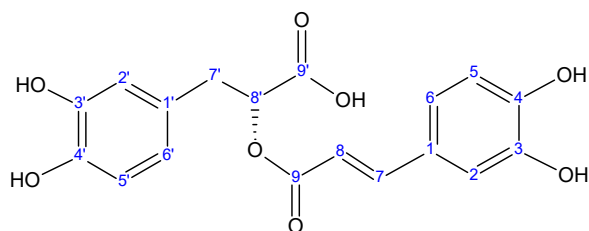

$^1\text{H}$ -NMR

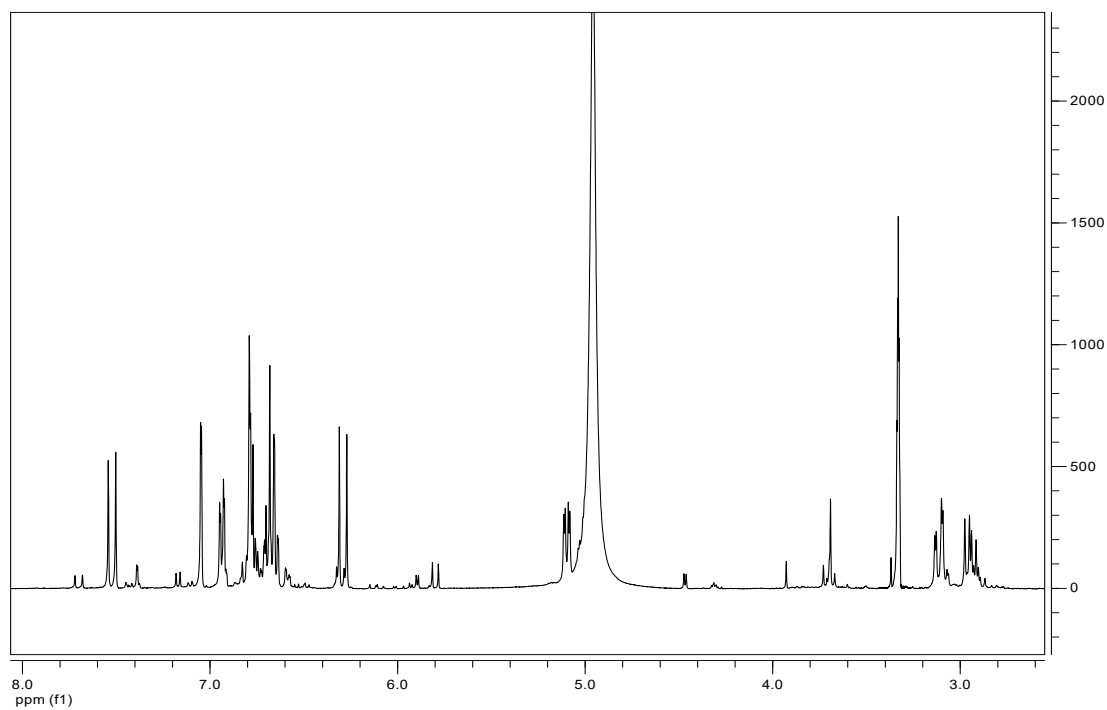

| position | $^1\text{H}$ , $\delta$ (ppm) | multiplicity | J (Hz)   |
|----------|-------------------------------|--------------|----------|
| 1        |                               |              |          |
| 2        | 7.03                          | d            | 2.0      |
| 5        | 6.77                          | d            | 8.0      |
| 6        | 6.92                          | d            | 8.0      |
| 7        | 7.50                          | d            | 16.0     |
| 8        | 6.27                          | d            | 16.0     |
| 2'       | 6.76                          | s            |          |
| 5'       | 6.67                          | d            | 8.0      |
| 6'       | 6.63                          | d            | 8.0      |
| 7'       | 2.93                          | dd           | 9.4/14.6 |
|          | 3.10                          | dd           | 2.8/14.6 |
| 8'       | 5.08                          | dd           | 2.8/9.6  |

# Rabdosiin disodium salt [1]

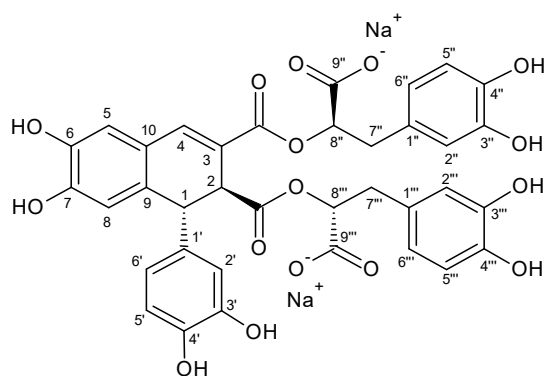

## <sup>1</sup>H-NMR

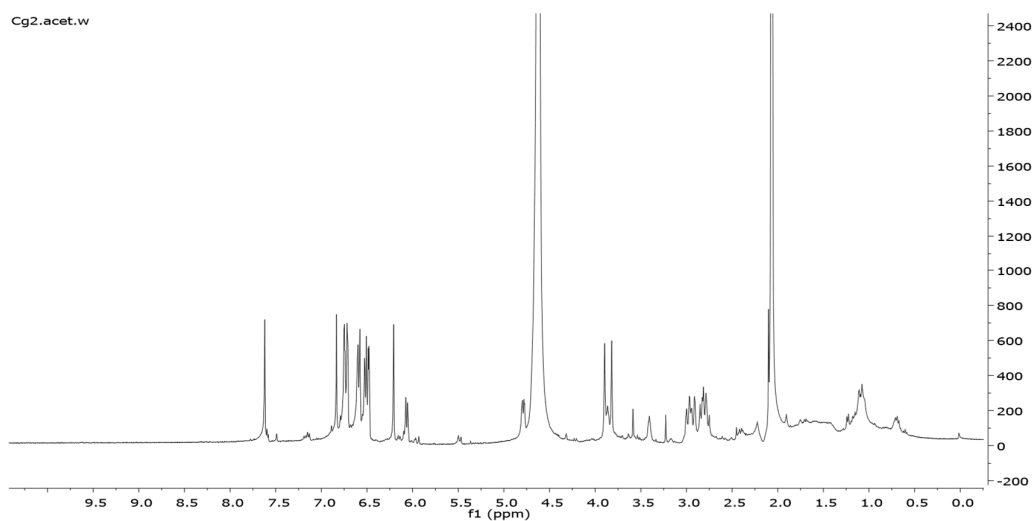

| position | <sup>1</sup> H, δ (ppm) | multiplicity | J (Hz)   |
|----------|-------------------------|--------------|----------|
| 1        | 3.88                    | brs          |          |
| 2        | 3.80                    | brs          |          |
| 4        | 7.60                    | s            |          |
| 5        | 6.82                    | s            |          |
| 8        | 6.46                    | s            |          |
| 2'       | 6.19                    | s            |          |
| 5'       | 6.48                    | d            | 8.1      |
| 6'       | 6.04                    | d            | 8.1      |
| 2''      | 6.70                    | s            |          |
| 5''      | 6.50                    | d            | 8.1      |
| 6''      | 6.57                    | d            | 8.1      |
| 7''      | 2.80 / 2.93             | m            |          |
| 8''      | 4.77                    | dd           | 8.9, 2.8 |
| 2'''     | 6.73                    | s            |          |
| 5'''     | 6.71                    | d            | 8.1      |
| 6'''     | 6.57                    | d            | 8.1      |
| 7'''     | 2.80 / 2.93             | m            |          |
| 8'''     | 4.66*                   |              |          |

\*data from HMBC.

Rinderol [3]

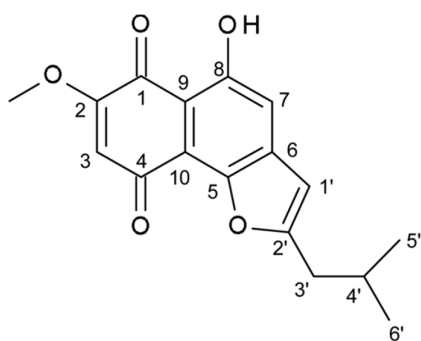

$^1\text{H}$ -NMR

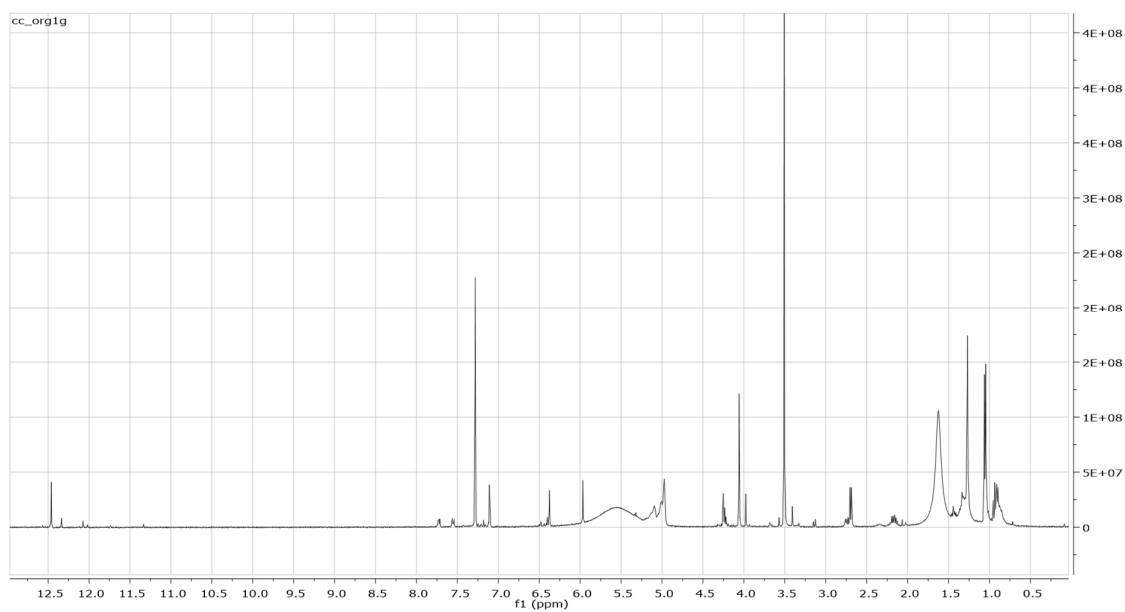

| position          | $^1\text{H}$ , $\delta$ (ppm) | multiplicity | J (Hz) |
|-------------------|-------------------------------|--------------|--------|
| 3                 | 5.94                          | s            |        |
| 7                 | 7.08                          | s            |        |
| 1'                | 6.35                          | s            |        |
| 3'                | 2.67                          | d            | 5.2    |
| 4'                | 2.14                          | m            |        |
| 5'                | 1.03                          | d            | 5.2    |
| 6'                | 1.03                          | d            | 5.2    |
| 8-OH              | 12.43                         | s            |        |
| CH <sub>3</sub> O | 4.03                          | s            |        |

# Quercetin 3-rutinoside-7-rhamnoside [2]

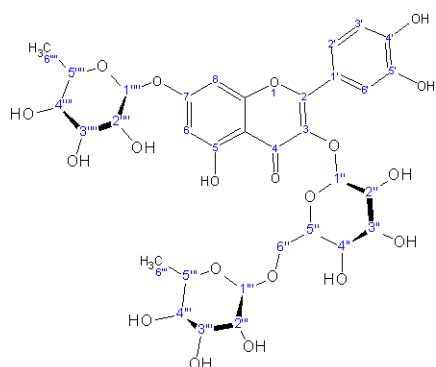

<sup>1</sup>H-NMR

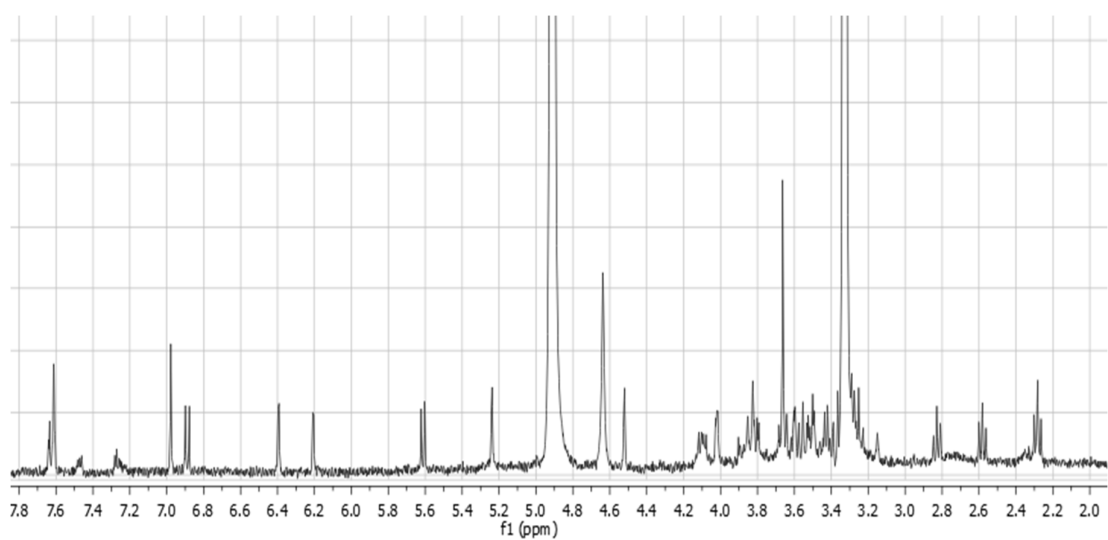

| position        | <sup>1</sup> H, δ (ppm) | multiplicity | J (Hz)    |
|-----------------|-------------------------|--------------|-----------|
| Quercetin       |                         |              |           |
| 6               | 6.21                    | d            | 2.0       |
| 8               | 6.39                    | d            | 2.0       |
| 2'              | 7.64                    | d            | 2.0       |
| 5'              | 6.89                    | d            | 8.5       |
| 6'              | 7.63                    | dd           | 2.0 / 8.0 |
| 3-glucoside     |                         |              |           |
| 1''             | 5.60                    | d            | 7.2       |
| 2'' - 5''       | 3.26 – 2.40             | m            |           |
| 6''- rhamnoside |                         |              |           |
| 1'''            | 4.52                    | brs          |           |
| 2''' – 5'''     | 3.27 – 3.62             | m            |           |
| 6'''            | 1.10                    | d            | 6.3       |
| 7 - rhamnoside  |                         |              |           |
| 6''''           | 1.02                    | d            | 6.3       |
| 1''''           | 5.22                    | brs          |           |

# Echinatine-N-oxide [4]

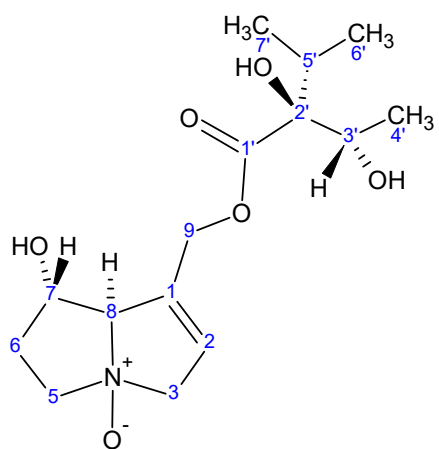

<sup>1</sup>H-NMR

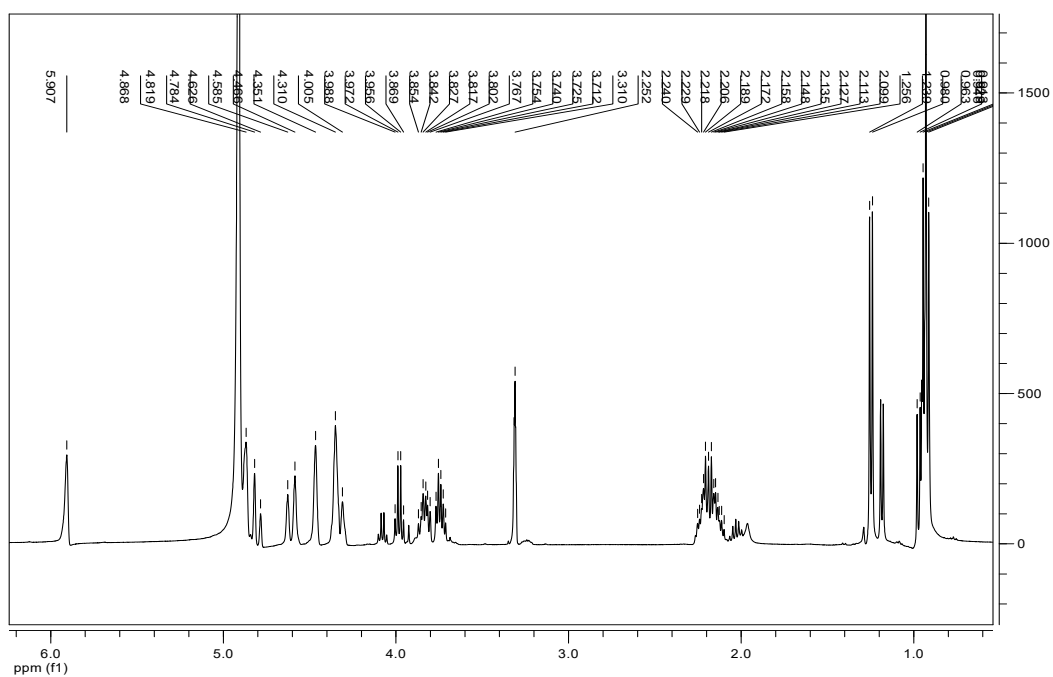

<sup>13</sup>C-NMR

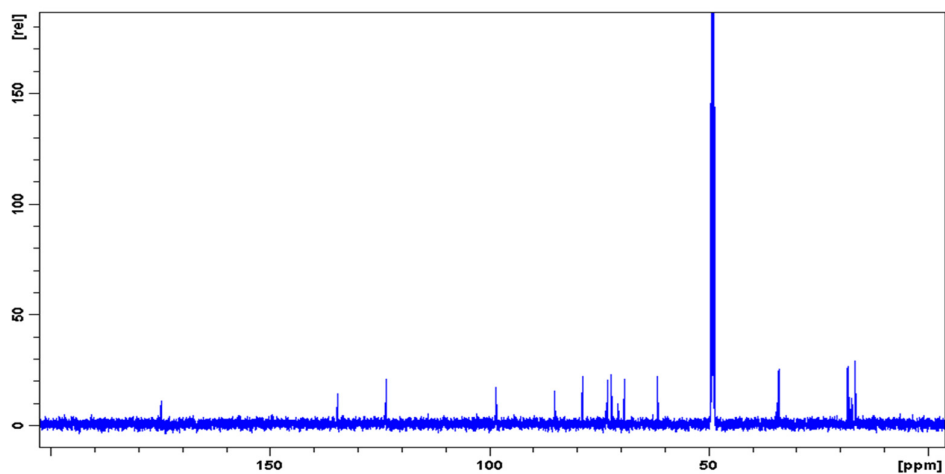

| position | <sup>13</sup> C, δ (ppm) | <sup>1</sup> H, δ (ppm), J (Hz)                                                                                                               |
|----------|--------------------------|-----------------------------------------------------------------------------------------------------------------------------------------------|
| 1'       | 174.8                    |                                                                                                                                               |
| 1        | 134.5                    |                                                                                                                                               |
| 2        | 123.4                    | 5.91 (1H, <i>br s</i> )                                                                                                                       |
| 8        | 98.4                     | 4.46 (1H, <i>br s</i> )                                                                                                                       |
| 2'       | 85.1                     |                                                                                                                                               |
| 3        | 78.7                     | 4.33 (1H, <i>d</i> , <sup>2</sup> J=16.4)/4.60 (1H, <i>d</i> , <sup>2</sup> J=16.4)                                                           |
| 7        | 73.1                     | 4.35 (1H, <i>br s</i> )                                                                                                                       |
| 3'       | 72.1                     | 3.96 (1H, <i>q</i> , <sup>3</sup> J=6.8)                                                                                                      |
| 5        | 69.2                     | 3.74 (1H, <i>ddd</i> , <sup>2</sup> J=10.0, <sup>3</sup> J=6.0, 5.2)/<br>3.83 (1H, <i>ddd</i> , <sup>2</sup> J=10.0, <sup>3</sup> J=6.0, 5.2) |
| 9        | 61.6                     | 4.79 (1H, <i>d</i> , <sup>2</sup> J=14.0)/4.88 (1H, <i>d</i> , <sup>2</sup> J=14.0)                                                           |
| 5'       | 34.2                     | 2.19 (1H, <i>m</i> , <sup>3</sup> J=6.8)                                                                                                      |
| 6        | 33.9                     | 2.14 (1H, <i>m</i> )/2.21 (1H, <i>m</i> )                                                                                                     |
| 4'       | 18.3                     | 1.24 (3H, <i>d</i> , <sup>3</sup> J=6.8)                                                                                                      |
| 6',7'    | 18.1/16.5                | 0.92/0.94 (3H, <i>d</i> , <sup>3</sup> J=6.8)                                                                                                 |

# Rinderine -N-oxide [4]

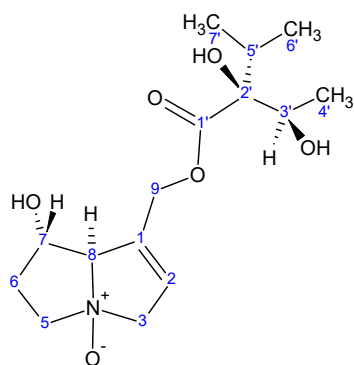

<sup>1</sup>H-NMR

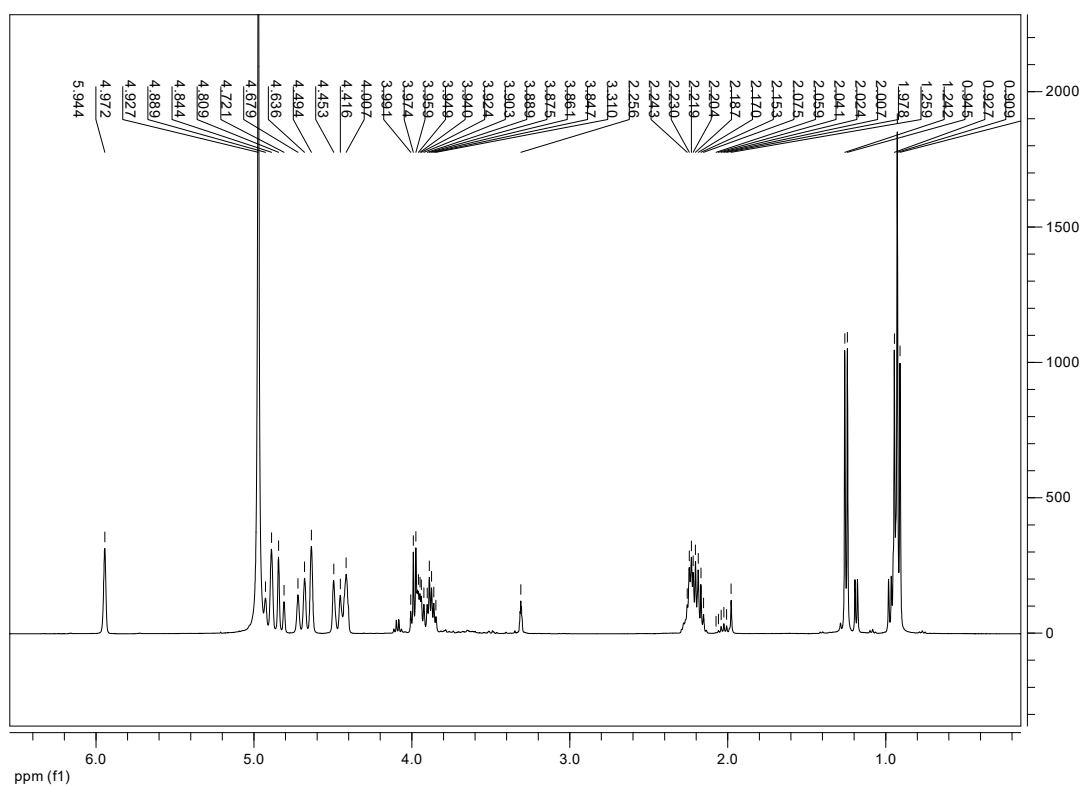



<sup>13</sup>C-NMR

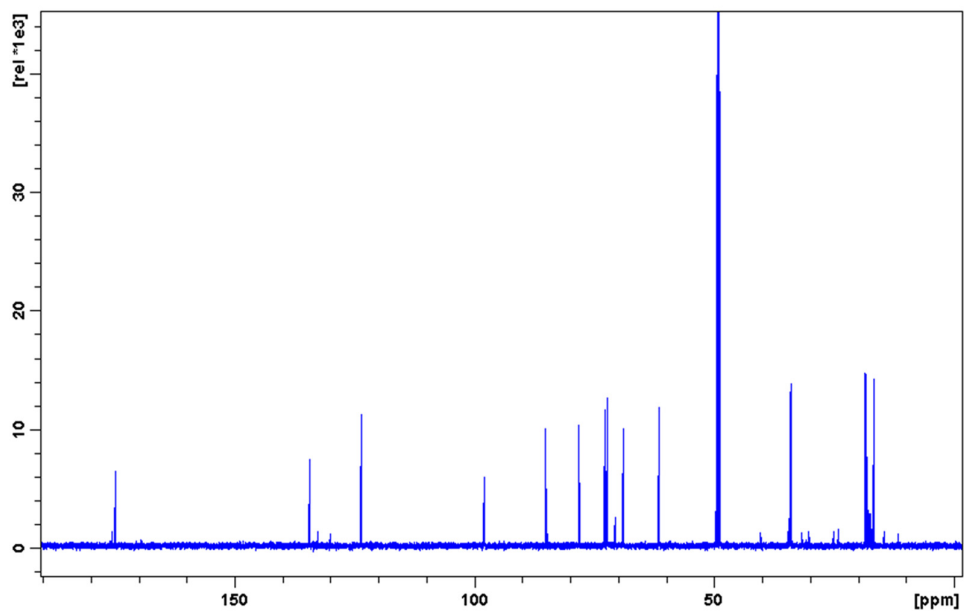

| position | <sup>13</sup> C, δ (ppm) | <sup>1</sup> H, δ (ppm), J (Hz)                                                     |
|----------|--------------------------|-------------------------------------------------------------------------------------|
| 1'       | 174.7                    |                                                                                     |
| 1        | 134.2                    |                                                                                     |
| 2        | 123.4                    | 5.94 (1H, <i>br s</i> )                                                             |
| 8        | 97.8                     | 4.64 (1H, <i>br s</i> )                                                             |
| 2'       | 85.1                     |                                                                                     |
| 3        | 78.0                     | 4.47 (1H, <i>d</i> , <sup>2</sup> J=16.4)/4.70 (1H, <i>d</i> , <sup>2</sup> J=16.4) |
| 7        | 72.7                     | 4.42 (1H, <i>br m</i> )                                                             |
| 3'       | 72.2                     | 3.98 (1H, <i>q</i> , <sup>3</sup> J=6.8)                                            |
| 5        | 68.9                     | 3.87 (1H, <i>m</i> )/3.96 (1H, <i>m</i> )                                           |
| 9        | 61.4                     | 4.82 (1H, <i>d</i> , <sup>2</sup> J=14.0)/4.91 (1H, <i>d</i> , <sup>2</sup> J=14.0) |
| 5'       | 33.9                     | 2.20 (1H, <i>sept</i> , <sup>3</sup> J=7.0)                                         |
| 6        | 34.1                     | 2.23 (2H, <i>m</i> )                                                                |
| 4'       | 18.3                     | 1.25 (3H, <i>d</i> , <sup>3</sup> J=6.8)                                            |
| 6',7'    | 18.1/16.5                | 0.92/0.94 (3H, <i>d</i> , <sup>3</sup> J=7.0)                                       |

# HPLC spectra of PA/PANOs

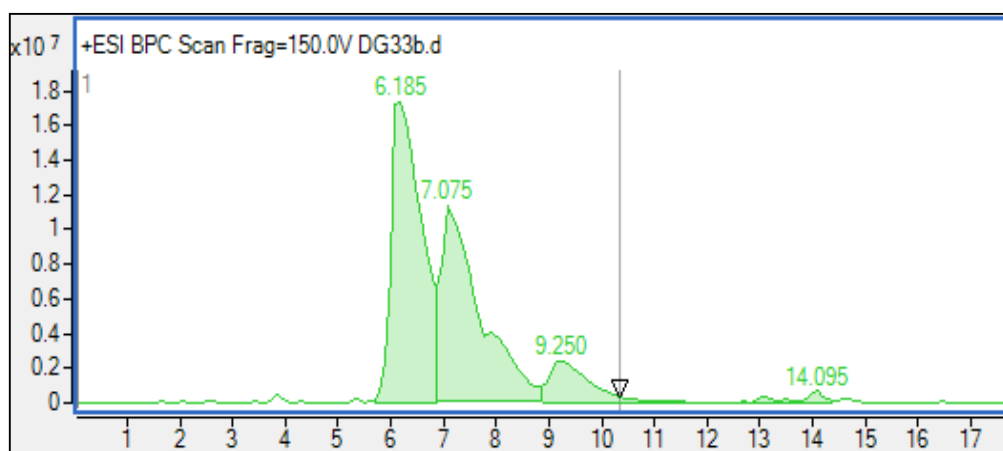

Echinatine-N-oxide [2]

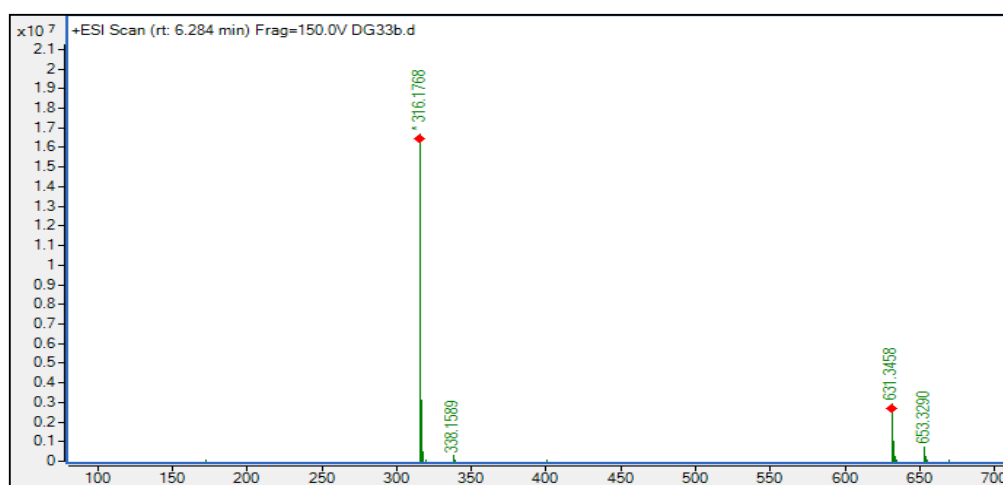

Rinderine -N-oxide [2]

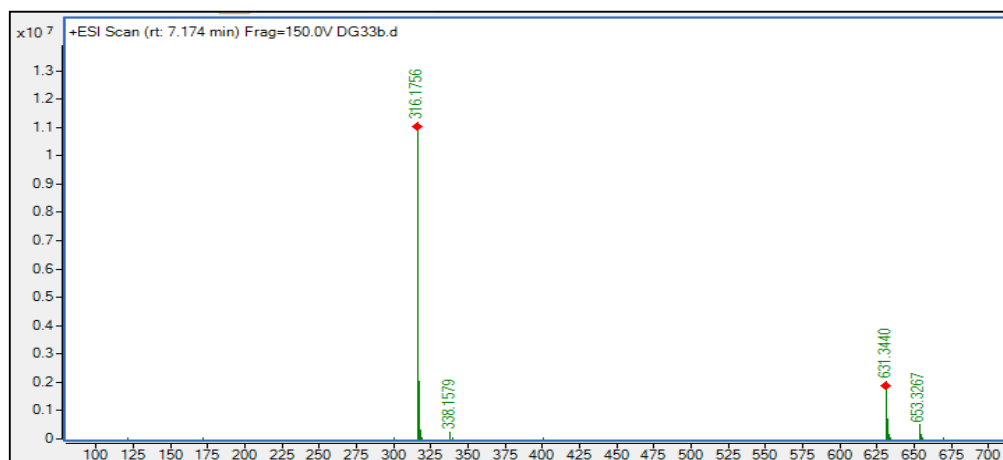

## Echinatine [2]

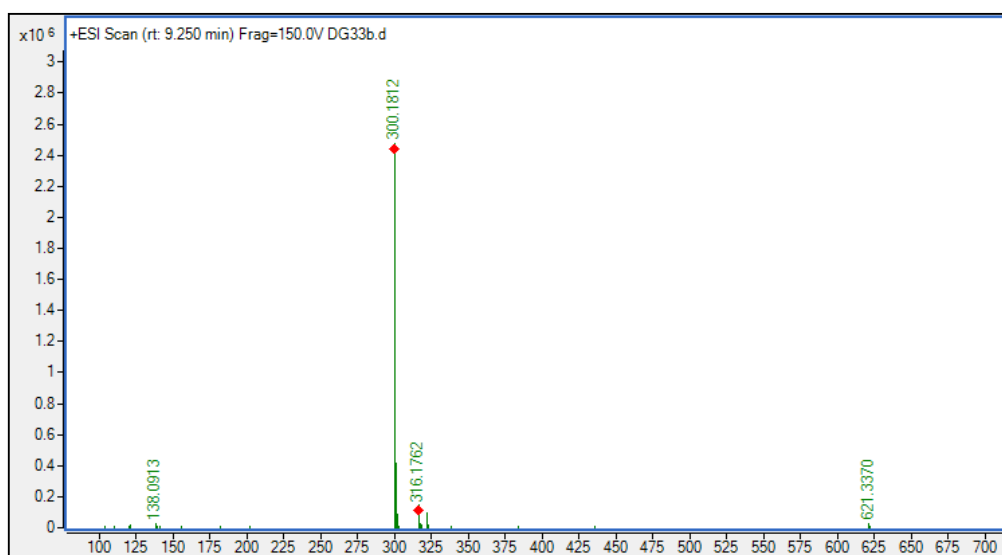

## References

1. Tufa, T., Damianakos, H., Zengin, G., Graikou, K., Chinou, I. Antioxidant and enzyme inhibitory activities of disodium rabdosiin isolated from *Alkanna sfikasiana* Tan, Vold and Strid. *S Afr J Bot*, 2019, 120, 157-162.
2. Ganos, C.; Aligiannis, N.; Chinou, I.; Naziris, N.; Chountoules, M.; Mroczek, T.; Graikou, K. *Rindera graeca* (Boraginaceae) phytochemical profile and biological activities. *Molecules*, 2020, 25, 3625 doi:10.3390/molecules25163625
3. Jeziorek, M., Damianakos, H., Kawiak, A., Laudy A.E., Zakrzewska, K., Sykłowska-Baranek, K., Chinou, I., Pietrosiuk, A. Bio-active rinderol and cynoglosol isolated from *Cynoglossum columnae* Ten. *in vitro* root culture. *Ind. Crops Prod.* 2019, 137, 446-452. doi: 10.1016/j.indcrop.2019.04.046
4. Damianakos, H.; Jeziorek, M.; Sykłowska-Baranek, K.; Buchwald, W.; Pietrosiuk, A.; Chinou, I. Pyrrolizidine alkaloids from *Cynoglossum columnae* Ten. (Boraginaceae). *Phytochemistry Letters* 2016, 15, 234–237, doi:10.1016/j.phytol.2016.02.005

# Thin Layer Chromatography (cellulose type)

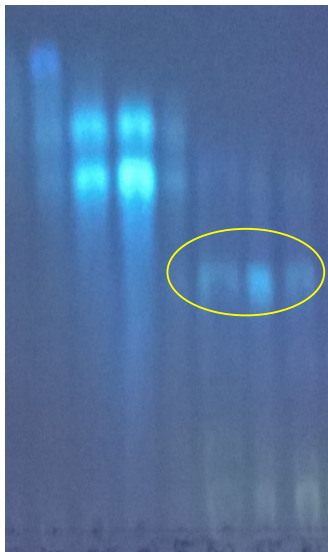

Rosmarinic acid (in yellow circle)

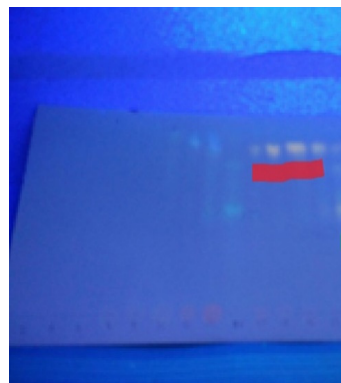

Quercetin 3-rutinoside-7-rhamnoside (red line)

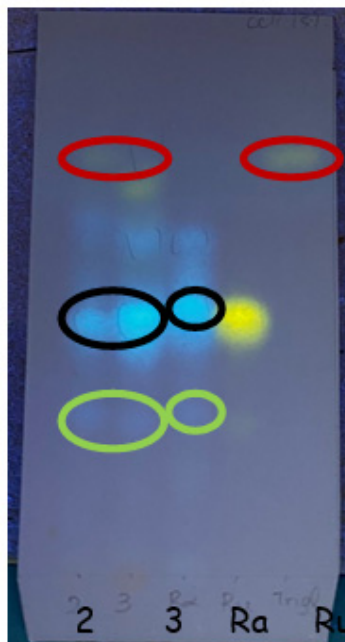

Trials.

2=Shoots, 3=roots, Ra=Rosmarinic acid (black) and Lithospermic acid (green), Ru=rutin, Triglc= Quercetin 3-rutinoside-7-rhamnoside

## Thin Layer Chromatography (silica type)

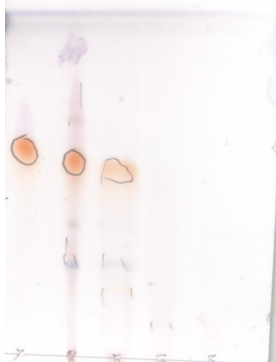

Rinderol (CH<sub>2</sub>Cl<sub>2</sub>/MeOH 99:1)
